# Supplementary material for: Simple construction of core–shell MnO2@TiO2with highly enhanced U(vi) adsorption performance and evaluated adsorption mechanism
Source: Royal Society of Chemistry journal article supplement (doi:10.1039/c8qi01379a), 2019-01-01
Supplement: c8qi01379a1.pdf [file c8qi01379a1.pdf]

## Simple construction of core-shell MnO<sub>2</sub>@TiO<sub>2</sub> with highly enhanced U(VI) adsorption performance and evaluated adsorption mechanism

Junping Ma,<sup>a</sup> Qiuyu Zhao,<sup>a</sup> Dongli Wei,<sup>a</sup> Haiqiang Liu,<sup>a</sup> Xiangke Wang,<sup>a</sup> Zhe Chen<sup>\*a</sup> and Jianjun Wang<sup>\*a</sup>

<sup>a</sup>. MOE Key Laboratory of Resources and Environmental Systems Optimization, College of Environmental Science and Engineering, North China Electric Power University, Beijing 102206, PR China

\*. Corresponding author. Tel (Fax): +86-10-61772890; Email: chenz@ncepu.edu.cn (Z. Chen),

wangjj2016@ncepu.edu.cn (J. Wang)

### Synthesis of MnO<sub>2</sub>

Synthesis of MnO<sub>2</sub>: Typically, 1 mmol of KMnO<sub>4</sub> and 1 mmol of NH<sub>4</sub>Cl were separately dispersed into Milli-Q water (30ml) under magnetic stirring for 10 min to form two clear solutions. Then, the NH<sub>4</sub>Cl solution was transferred to the KMnO<sub>4</sub> solution. After stirring for another 10 min, the obtained homogeneous solution was poured into a Teflon-lined autoclave (100 mL in capacity) and kept in an oven at 200 °C for 24 h. After cooling down to room temperature naturally, the resultant product was collected by centrifugation, and then washed with Milli-Q water and ethanol several times.

### Characterization

The SEM images were performed via a Hitachi S4800 microscope, while the TEM images were conducted by applying the Jeol Jem-2100F transmission electron microscope. Elemental mapping analyses were recorded to explore the composition of the achieved samples by energy-dispersive X-ray spectroscope attached to the TEM apparatus. The crystalloid phases of MnO<sub>2</sub> and MnO<sub>2</sub>@TiO<sub>2</sub> were analyzed through XRD on a Bruker D8advance X-Ray Diffractometer allocated with Ni filtered Cu K $\alpha$  radiation ( $\lambda = 1.5406 \text{ \AA}$ ) from the range of 10° to 80° at a scanning speed of 0.05° per second. A Nicolet Magana-IR 750 spectrometer (USA) whose meterage wavenumber is in the range of 275 - 4000 cm<sup>-1</sup> was utilized to gauge FT-IR spectroscopy measurements at ambient temperature. The BET specific surface area tests were measured using the Tristar 3020 instrument at 77 K. The Thermo Fischer ESCALAB 250Xi electron spectrometer equipped with an Al K $\alpha$  radiation source was employed to obtain XPS spectra. Zeta-potential values of MnO<sub>2</sub>@TiO<sub>2</sub> were gauged through a Zetasizer Nano ZS from Malvern.

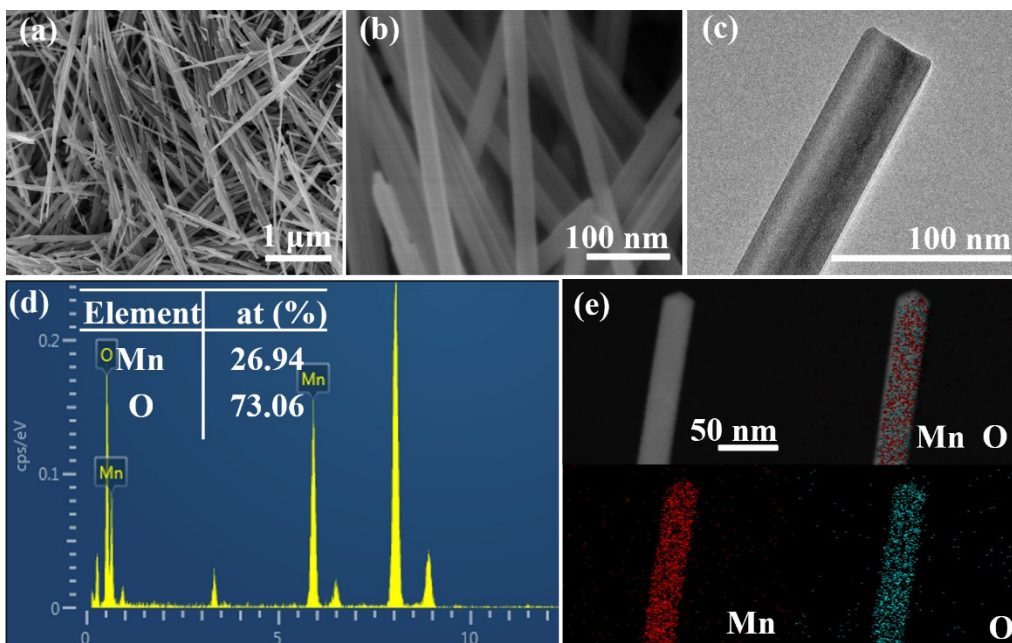

Fig. S1 (a, b) SEM, (c) TEM photographs, (d) EDX spectrum and (e) Elemental mapping of  $\text{MnO}_2$ .

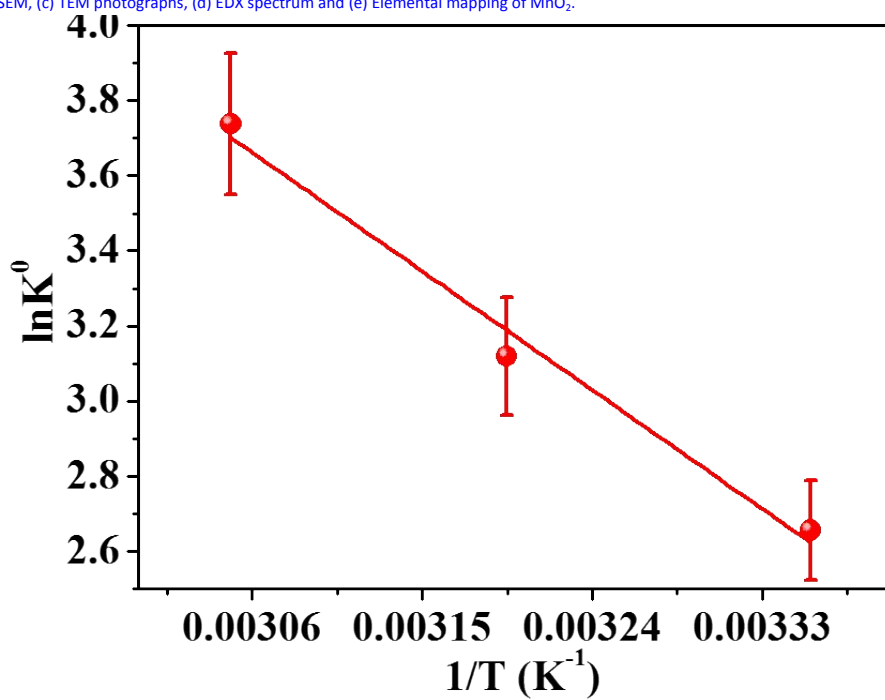

Fig. S2 linear plots of  $\ln K^0$  to  $1/T$  for the adsorption of  $\text{U(VI)}$  onto  $\text{MnO}_2@ \text{TiO}_2$ .

**Table S1** Comparison of thermodynamic parameters, equilibrium time and maximum adsorption capacities of U(VI) on other adsorbents

| Adsorbents                                           | $q_m$<br>(mg/g) | Equilibrium<br>time (min) | Conditions    | Thermodynamic parameters |                              |                          | Refs      |
|------------------------------------------------------|-----------------|---------------------------|---------------|--------------------------|------------------------------|--------------------------|-----------|
|                                                      |                 |                           |               | $\Delta H^0$<br>(KJ/mol) | $\Delta S^0$<br>(J/ (mol K)) | $\Delta G^0$<br>(KJ/mol) |           |
| Fe <sub>3</sub> O <sub>4</sub> @SiO <sub>2</sub> -AO | 105.0           | 1440                      | pH 5.5, 298 K | 14.85                    | 114.40                       | -18.43                   | 1         |
| TiO <sub>2</sub> -x                                  | 65.4            | 120                       | pH 5.0, 298 K | 7.79                     | 0.03                         | -1.32                    | 2         |
| Fe <sub>3</sub> O <sub>4</sub> @MnO <sub>2</sub>     | 14.0            | 180                       | pH 5.5, 293 K | 10.48                    | 85.56                        | -14.59                   | 3         |
| MnO <sub>2</sub> @PPy                                | 63.0            | 300                       | pH 5.0, 298 K | 26.98                    | 115.15                       | -7.43                    | 4         |
| HMO                                                  | 68.4            | 50                        | pH 5.0, 298 K | 10.51                    | 53.62                        | -5.54                    | 5         |
| FA@PEI                                               | 70.3            | 90                        | pH 5.0, 298 K | 11.44                    | 52.91                        | -4.41                    | 6         |
| PANI/H-TNB                                           | 216.8           | 300                       | pH 5.0, 293 K | 30.77                    | 134.75                       | -11.41                   | 7         |
| Fe <sub>3</sub> O <sub>4</sub> @TiO <sub>2</sub>     | 91.1            | 175                       | pH 6.0, 298 K | 23.82                    | 87.41                        | -1.8                     | 8         |
| PVA/TiO <sub>2</sub> /APTES                          | 29.7            | 300                       | pH 4.5, 298 K | 3.88                     | 20.6                         | -2.24                    | 9         |
| MnO <sub>2</sub> @TiO <sub>2</sub>                   | 105.3           | 20                        | pH 5.0, 298 K | 29.21                    | 119.84                       | -6.58                    | This work |

**Table S2** The XPS data of MnO<sub>2</sub>@TiO<sub>2</sub> and MnO<sub>2</sub>@TiO<sub>2</sub>-U.

| Samples                               | Binding Energy (eV) |        |                                             |                                         |                                         |                      |                     |                     |
|---------------------------------------|---------------------|--------|---------------------------------------------|-----------------------------------------|-----------------------------------------|----------------------|---------------------|---------------------|
|                                       | O 1s                |        |                                             | Ti 2p                                   |                                         |                      | U 4f                |                     |
|                                       | Ti-O-Ti             | Ti-O-H | the surface-<br>adsorbed water<br>molecules | Ti 2p <sub>3/2</sub> , Ti <sup>3+</sup> | Ti 2p <sub>3/2</sub> , Ti <sup>4+</sup> | Ti 2p <sub>1/2</sub> | U 4f <sub>7/2</sub> | U 4f <sub>5/2</sub> |
| MnO <sub>2</sub> @TiO <sub>2</sub>    | 529.7               | 531.3  | 533.2                                       | 458.05                                  | 459.1                                   | 463.9                | -                   | -                   |
| MnO <sub>2</sub> @TiO <sub>2</sub> -U | 529.92              | 531.41 | 533.5                                       | 458.2                                   | 459.1                                   | 463.9                | 381.74              | 392.67              |

## Notes and references

- 1 Y. Zhao, J. Li, L. Zhao, S. Zhang, Y. Huang, X. Wu and X. Wang, *Chemical Engineering Journal*, 2014, **235**, 275-283.
- 2 S. Song, S. Huang, R. Zhang, Z. Chen, T. Wen, S. Wang, T. Hayat, A. Alsaedi and X. Wang, *Chemical Engineering Journal*, 2017, **325**, 576-587.
- 3 J. Zhang, Z. Guo, Y. Li, S. Pan, X. Chen and J. Xu, *Journal of Molecular Liquids*, 2016, **223**, 534-540.
- 4 W. Yao, Y. Wu, H. Pang, X. Wang, S. Yu and X. Wang, *Science China Chemistry*, 2018, **61**, 812-823.
- 5 C. Yang, D. Niu, Y. Zhong, L. Lei, H. Lv and Y. Liu, *Journal of Radioanalytical & Nuclear Chemistry*, 2018, **315**, 533-542.
- 6 H. Pang, S. Huang, Y. Wu, D. Yang, X. Wang, S. Yu, Z. Chen, A. Alsaedi, T. Hayat and X. Wang, *Inorganic Chemistry Frontiers*, 2018, **5**, 2399-2407.
- 7 Y. Liu, Y. Yang, L. Chen, H. Zhu, Y. Dong, N. S. Alharbi, A. Alsaedi and J. Hu, *RSC Advances*, 2016, **6**, 56139-56148.
- 8 L. Tan, X. Zhang, Q. Liu, X. Jiang, J. Liu, D. Song, S. Hu, L. Liu and J. Wang, *Colloids and Surfaces A: Physicochemical and Engineering Aspects*, 2015, **469**, 279-286.
- 9 S. Abbasizadeh, A. R. Keshtkar and M. A. Mousavian, *Journal of Industrial and Engineering Chemistry*, 2014, **20**, 1656-1664.
